# Supplementary material for: Studies on the Functional Properties of Titanium Dioxide Nanoparticles Distributed in Silyl–Alkyl Bridged Polyaniline-Based Nanofluids
Source: MDPI journal article supplement (doi:10.3390/nano13162332), 2023-08-14
Supplement: s1 [file s1]

## Supporting information

**Table S1.** A brief literature on thermal conductivity and related information for the nanofluids having TiO<sub>2</sub> / PANI/Silica included composites as solid component

| Solid component                              | Base fluid             | Thermal conductivity enhancement (%) | Reference    |
|----------------------------------------------|------------------------|--------------------------------------|--------------|
| TiO <sub>2</sub> /Cu                         | water                  | 2.72                                 | [125]        |
| TiO <sub>2</sub> /SiO <sub>2</sub> composite | Ethylene glycol        | 1.2                                  | [126]        |
| TiO <sub>2</sub> –SiO <sub>2</sub> hybrid    | Ethylene glycol        | 22.1                                 | [101]        |
| TiO <sub>2</sub> -ZnO                        | Ethylene glycol        | 32                                   | [127]        |
| CuO/PANI                                     | water                  | 12                                   | [128])       |
| CuO                                          | Ethylene glycol        | 54                                   | [113]        |
| T-PSA NC1- T-PSA NC5                         | Ethylene glycol: water | 84.9 to 86.7 (Table 1; main paper)   | Present work |
| TiO <sub>2</sub>                             | water                  | 32.8                                 | [129]        |
| TiO <sub>2</sub>                             | Water*                 | 53.9                                 | [130]        |
| TiO <sub>2</sub>                             | Ethylene glycol        | 12.1                                 | [131]        |
| TiO <sub>2</sub>                             | Ethylene glycol: water | 46.1                                 | [132]        |
| Silica                                       | water                  | 2.32                                 | [133]        |
| **Silica                                     | water                  | 28.34                                | [134]        |
| Silica (non porous)                          | Ethylene glycol        | 17.4                                 | [134]        |
| Mesoporous silica                            | Ethylene glycol: water | 22                                   | [135]        |
| PANI (un doped)                              | Water/surfactant       | 1.20                                 | [136])       |
| PANI (doped)                                 | Water/surfactant       | 2.35                                 | [137]        |
| PSA                                          | Ethylene glycol: water | 84.3 (Table 1; main paper)           | Present work |

Thermal conductivity values. Water = 0.607 W/m.K; ethylene glycol= 0.254 W/m.K ([136,138,139]; Details like temperature, volumetric/mass (%) of solid component and other details can be referred at the respective references. PANI=Polyaniline, \* Corrugated tube, \*\* sonication effect

Filename: nanomaterials-2477967-supplementary.docx  
Directory: E:\2023\8\14\pdf\22  
Template: C:\Users\MDPI\AppData\Roaming\Microsoft\Templates\Normal.  
dotm  
Title:  
Subject:  
Author: 19683  
Keywords:  
Comments:  
Creation Date: 2023/8/13 3:28:00  
Change Number: 5  
Last Saved On: 2023/8/14 10:12:00  
Last Saved By: MDPI  
Total Editing Time: 3 Minutes  
Last Printed On: 2023/8/14 15:50:00  
As of Last Complete Printing  
Number of Pages: 1  
Number of Words: 191 (approx.)  
Number of Characters: 1,092 (approx.)
